# Supplementary material
Source: MDPI journal article supplement (https://www.mdpi.com/1996-1073/15/2/561)
Supplement: s1 [file s1 › energies-1482295-supplementary.pdf]

# Adaptive Laboratory Evolution for Multistress Tolerance, including Fermentability at High Glucose Concentrations in Thermotolerant *Candida tropicalis*

Koudkeo Phommachan <sup>1</sup>, Chansom Keo-oudone <sup>2</sup>, Mochamad Nurcholis <sup>3</sup>, Nookhao Vongvilaisak <sup>2</sup>, Mingkhuan Chanhming <sup>2</sup>, Vanhnavong Savanhnaly <sup>2</sup>, Somchanh Bounphanmy <sup>2</sup>, Minenosuke Matsutani <sup>4,†</sup>, Tomoyuki Kosaka <sup>1,4,5</sup>, Savitree Limtong <sup>6</sup> and Mamoru Yamada <sup>1,4,5,\*</sup>

<sup>1</sup> Graduate School of Sciences and Technology for Innovation, Yamaguchi University, Yamaguchi 753-8515, Japan; koudkeo.phommachan@gmail.com (K.P.); tkosaka@yamaguchi-u.ac.jp (T.K.)

<sup>2</sup> Department of Biology, Faculty of Natural Science, National University of Laos, Vientiane 7322, Laos; chansom\_k@yahoo.com (C.K.-o.); nookhao.vong@gmail.com (N.V.); Mingkhuan@gmail.com (M.C.); Cocosavanhnaly@gmail.com (V.S.); sbounphanmy@nuol.edu.la (S.B.)

<sup>3</sup> Department of Food Science and Technology, Faculty of Agricultural Technology, Brawijaya University, Malang 65145, Indonesia; cholis\_federer@yahoo.co.id

<sup>4</sup> Department of Biological Chemistry, Faculty of Agriculture, Yamaguchi University, Yamaguchi 753-8515, Japan; mm207299@nodai.ac.jp

<sup>5</sup> Research Center for Thermotolerant Microbial Resources, Yamaguchi University, Yamaguchi 753-8315, Japan

<sup>6</sup> Department of Microbiology, Faculty of Science, Kasetsart University, Bangkok 10900, Thailand; fscistl@ku.ac.th

\* Correspondence: m-yamada@yamaguchi-u.ac.jp

† Present address: Minenosuke Matsutani, NODAI Genome Research Center, Tokyo University of Agriculture, Tokyo 156-8502, Japan.

## Supplementary Materials

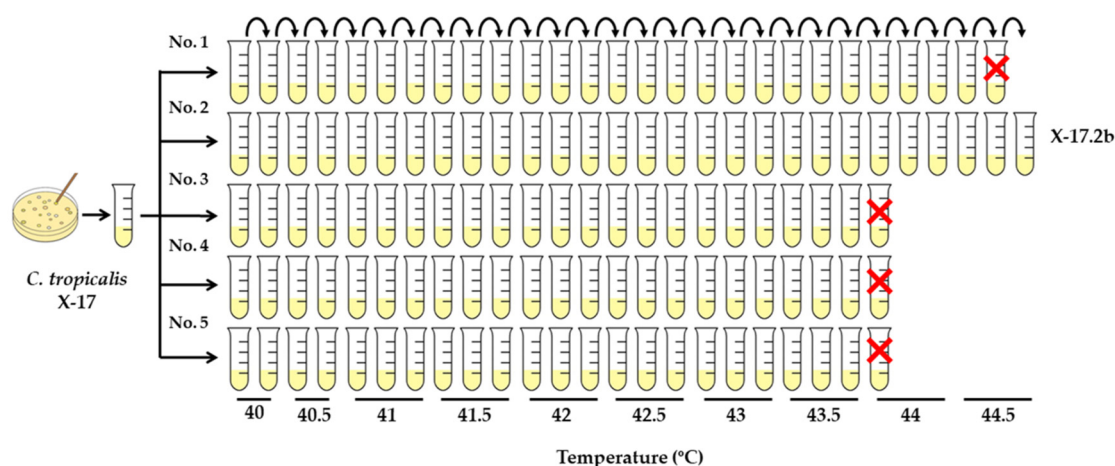

**Figure S1:** Schematic diagram of RLCGT for *C. tropicalis* X-17. *C. tropicalis* X-17 was cultured in five tubes in parallel in a 5-ml YP liquid medium containing 200 g·L<sup>-1</sup> of glucose under a shaking condition at 100 rpm for 7 days and the cultivation was repeated with gradually increasing temperature from 40 °C to 44.5 °C. At each step, cells were transferred to a fresh medium at the initial OD<sub>660</sub> value of 0.1.

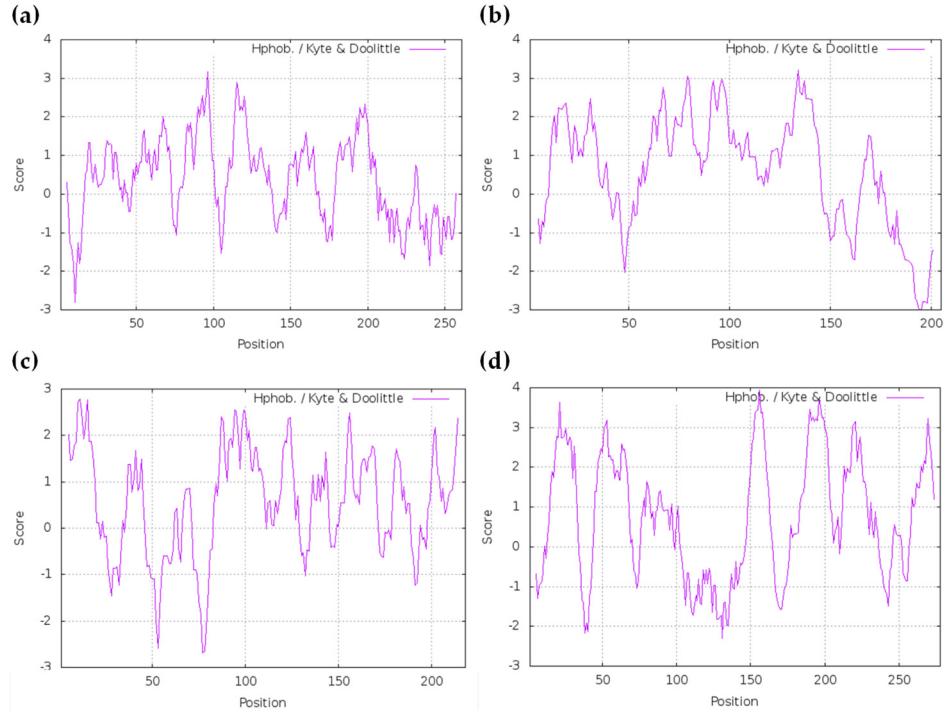

**Figure S2:** Hydropathy analysis of four hypothetical proteins of which genes were up-regulated in X-17.2b. Hydropathy profiles of a glucose transporter encoded by *CTRG\_06250* (a), a hypothetical protein encoded by *CTRG\_06056* (b), a hypothetical protein encoded by *CTRG\_00691* (c) and a hypothetical protein encoded by *CTRG\_01139* (d) are shown. Hydropathy analysis was performed by the method of Kyte and Doolittle [36].

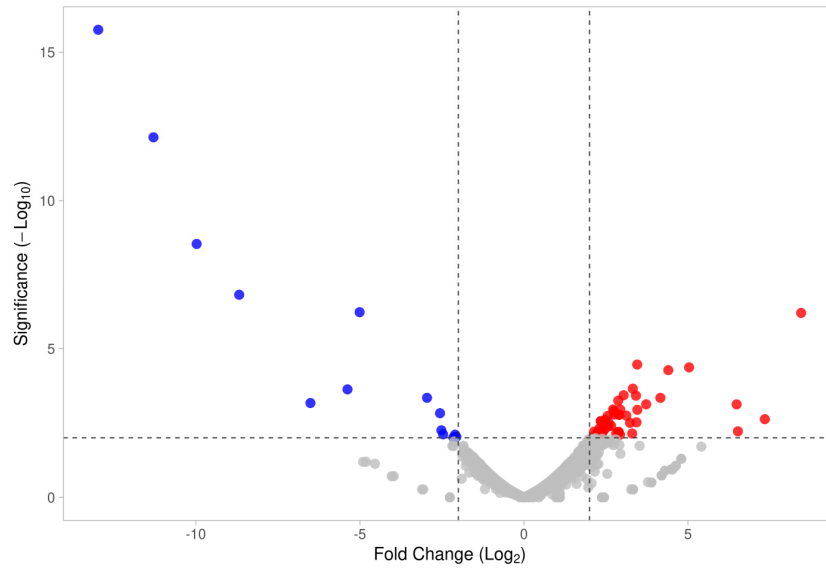

**Figure S3:** Volcano plots of differentially expressed genes (DEGs) of adapted strain X-17.2b versus the parental strain X-17 at 37 °C for 12 h. Genes with adjusted *P*-values less than 0.01 and  $\log_2$  (fold change) values greater than 2 and less than -2 were assigned as genes with differential expression. Red symbols, significantly up-regulated genes; blue symbols, significantly down-regulated genes.

**Table S1.** Significantly down-regulated genes ( $\log_2 < -2$ ) in the adapted strain.

| Name       | Log <sub>2</sub> Fold Change | Product                                             |
|------------|------------------------------|-----------------------------------------------------|
| CTRG_04849 | -2.1                         | Oxidoreductase                                      |
| CTRG_00109 | -2.1                         | Hypothetical protein                                |
| CTRG_00211 | -2.1                         | Fructose-bisphosphate aldolase                      |
| CTRG_05493 | -2.2                         | RNA polymerase II transcription factor B subunit 5  |
| CTRG_01742 | -2.2                         | Transporter protein SMF1/ESP1                       |
| CTRG_05850 | -2.2                         | Hypothetical protein                                |
| CTRG_05940 | -2.3                         | Meiotic sister chromatid recombination protein 1    |
| CTRG_04226 | -2.3                         | Hypothetical protein                                |
| CTRG_00580 | -2.3                         | Putative diacetyl reductase [(R)-acetoin forming] 2 |
| CTRG_00882 | -2.5                         | NAD-dependent alcohol dehydrogenase                 |
| CTRG_00284 | -2.5                         | Glutathione S-transferase 1                         |
| CTRG_05790 | -2.5                         | Respiratory supercomplex factor 2, mitochondrial    |
| CTRG_01828 | -2.6                         | Hypothetical protein                                |
| CTRG_01856 | -2.7                         | Hypothetical protein                                |
| CTRG_03259 | -2.8                         | Hypothetical protein                                |
| CTRG_03258 | -3.3                         | Hypothetical protein                                |
| CTRG_04826 | -5.2                         | Hypothetical protein                                |
| CTRG_04987 | -5.8                         | Sodium transport ATPase 2                           |
